# Supplementary material
Source: PubMed Central journal article supplement (PMC3972766)
Supplement: NIHMS428214-supplement-supplement_1.pdf [file NIHMS428214-supplement-supplement_1.pdf]

**Supplemental Table 1**

Annual Consumption of 132 Foods from the Food Frequency Questionnaire by the 15 food categories

| Category* / Foods               | Annual Consumption |       |       |     |        |        | Seasonality weight <sup>3</sup> | 22 foods included in factor analysis |
|---------------------------------|--------------------|-------|-------|-----|--------|--------|---------------------------------|--------------------------------------|
|                                 | N†                 | Mean  | SD    | Min | Median | Max    |                                 |                                      |
| <b>Beverages</b>                |                    |       |       |     |        |        |                                 |                                      |
| Chocolate milk or hot chocolate | 368                | 27.5  | 102.7 | 0   | 0.0    | 912.5  | 1.00                            | No                                   |
| Energy Drinks                   | 368                | 35.5  | 162.3 | 0   | 0.0    | 1642.5 | 1.00                            | No                                   |
| Diet soda                       | 368                | 38.5  | 186.5 | 0   | 0.0    | 1642.5 | 1.00                            | No                                   |
| Unsweetened drinks              | 368                | 45.1  | 157.5 | 0   | 0.0    | 1642.5 | 1.00                            | No                                   |
| White milk                      | 365                | 65.3  | 207.5 | 0   | 0.0    | 1642.5 | 1.00                            | No                                   |
| Citrus juice                    | 367                | 75.2  | 206.1 | 0   | 24.0   | 2190.0 | 1.00                            | Yes                                  |
| Sweetened drinks                | 368                | 235.9 | 405.1 | 0   | 78.3   | 2190.0 | 1.00                            | Yes                                  |
| Tang                            | 368                | 271.6 | 412.4 | 0   | 78.3   | 2190.0 | 1.00                            | No                                   |
| Tea                             | 368                | 312.4 | 385.5 | 0   | 78.3   | 1642.5 | 1.00                            | No                                   |
| Regular soda                    | 368                | 324.8 | 458.0 | 0   | 182.6  | 2190.0 | 1.00                            | No                                   |
| Sugar or honey                  | 368                | 567.7 | 560.0 | 0   | 365.0  | 2190.0 | 1.00                            | No                                   |
| Coffee                          | 368                | 655.6 | 471.7 | 0   | 365.0  | 2190.0 | 1.00                            | No                                   |
| <b>Bread and crackers</b>       |                    |       |       |     |        |        |                                 |                                      |
| Cornbread                       | 368                | 2.9   | 15.0  | 0   | 0.0    | 182.6  | 1.00                            | No                                   |
| Fruit bread                     | 368                | 14.2  | 60.6  | 0   | 0.0    | 730.0  | 1.00                            | No                                   |
| Crackers                        | 367                | 33.1  | 75.3  | 0   | 12.0   | 730.0  | 1.00                            | No                                   |
| Whole wheat/multi grain bread   | 368                | 40.6  | 76.9  | 0   | 12.0   | 730.0  | 1.00                            | No                                   |
| Pancake syrup                   | 368                | 42.8  | 75.4  | 0   | 30.0   | 730.0  | 1.00                            | No                                   |
| Pancakes                        | 368                | 58.8  | 106.9 | 0   | 30.0   | 730.0  | 1.00                            | Yes                                  |
| White bread                     | 368                | 111.3 | 161.8 | 0   | 30.0   | 730.0  | 1.00                            | No                                   |
| Pilot Bread                     | 368                | 293.3 | 275.1 | 0   | 182.6  | 730.0  | 1.00                            | No                                   |
| <b>Cereals</b>                  |                    |       |       |     |        |        |                                 |                                      |
| Oatmeal, porridge, mush, etc.   | 368                | 17.4  | 61.8  | 0   | 0.0    | 730.0  | 1.00                            | No                                   |
| Yogurt                          | 368                | 20.7  | 54.6  | 0   | 0.0    | 730.0  | 1.00                            | No                                   |
| Instant oatmeal                 | 368                | 26.3  | 72.8  | 0   | 0.0    | 730.0  | 1.00                            | No                                   |
| Dry cereals                     | 368                | 27.1  | 70.7  | 0   | 0.0    | 730.0  | 1.00                            | No                                   |
| Cheese                          | 368                | 38.2  | 78.1  | 0   | 12.0   | 730.0  | 1.00                            | No                                   |
| Dry high fiber cereals          | 368                | 42.9  | 96.8  | 0   | 12.0   | 730.0  | 1.00                            | No                                   |
| Sweetened cereals               | 368                | 50.4  | 95.4  | 0   | 12.0   | 730.0  | 1.00                            | Yes                                  |
| <b>Desserts and snacks</b>      |                    |       |       |     |        |        |                                 |                                      |
| Cool Whip                       | 368                | 9.9   | 29.0  | 0   | 0.0    | 287.0  | 1.00                            | No                                   |

|                                |     |       |       |   |      |       |      |     |
|--------------------------------|-----|-------|-------|---|------|-------|------|-----|
| Trail mix                      | 368 | 11.6  | 36.1  | 0 | 0.0  | 365.0 | 1.00 | No  |
| Pudding and jello              | 368 | 11.7  | 29.5  | 0 | 0.0  | 365.0 | 1.00 | Yes |
| Nuts                           | 368 | 12.6  | 34.3  | 0 | 0.0  | 287.0 | 1.00 | No  |
| Granola bars, cereal bar, etc. | 368 | 25.6  | 65.5  | 0 | 12.0 | 730.0 | 1.00 | No  |
| Cakes or muffins               | 368 | 26.9  | 67.7  | 0 | 12.0 | 730.0 | 1.00 | No  |
| Pastry, doughnut, etc.         | 368 | 28.0  | 61.1  | 0 | 12.0 | 730.0 | 1.00 | No  |
| Ice cream                      | 367 | 29.9  | 72.0  | 0 | 12.0 | 730.0 | 1.00 | No  |
| Cookies                        | 368 | 36.4  | 77.3  | 0 | 12.0 | 730.0 | 1.00 | No  |
| Hard candy or other sweets     | 368 | 50.6  | 99.7  | 0 | 12.0 | 730.0 | 1.00 | No  |
| Salty snacks                   | 368 | 56.3  | 94.7  | 0 | 30.0 | 730.0 | 1.00 | Yes |
| Akutaq (any kind)              | 368 | 82.2  | 134.8 | 0 | 30.0 | 730.0 | 1.00 | No  |
| Candy bar or chocolate         | 367 | 86.8  | 141.3 | 0 | 30.0 | 730.0 | 1.00 | No  |
| <hr/>                          |     |       |       |   |      |       |      |     |
| Other main courses             |     |       |       |   |      |       |      |     |
| Tuna noodle casserole          | 368 | 6.8   | 46.6  | 0 | 0.0  | 730.0 | 1.00 | No  |
| Egg rolls                      | 368 | 7.4   | 27.8  | 0 | 0.0  | 287.0 | 1.00 | No  |
| Macaroni and cheese            | 368 | 18.5  | 46.5  | 0 | 0.0  | 365.0 | 1.00 | No  |
| Fried rice                     | 367 | 22.7  | 65.9  | 0 | 0.0  | 730.0 | 1.00 | No  |
| Spaghetti or pasta (meat)      | 368 | 26.4  | 41.2  | 0 | 12.0 | 287.0 | 1.00 | No  |
| Canned soup                    | 368 | 27.3  | 67.6  | 0 | 12.0 | 730.0 | 1.00 | No  |
| Pizza                          | 366 | 32.1  | 74.4  | 0 | 12.0 | 730.0 | 1.00 | Yes |
| Ramen noodles/Cup of Noodles   | 367 | 74.8  | 124.0 | 0 | 30.0 | 730.0 | 1.00 | No  |
| Plain rice                     | 366 | 122.5 | 140.9 | 0 | 52.2 | 730.0 | 1.00 | No  |
| <hr/>                          |     |       |       |   |      |       |      |     |
| Store-bought bird              |     |       |       |   |      |       |      |     |
| Chicken stir-fry               | 368 | 9.3   | 23.8  | 0 | 0.0  | 182.6 | 1.00 | No  |
| Cooked chicken or turkey       | 367 | 15.6  | 44.9  | 0 | 12.0 | 730.0 | 1.00 | No  |
| Fried chicken                  | 368 | 22.7  | 36.6  | 0 | 12.0 | 287.0 | 1.00 | Yes |
| Chicken or turkey soup         | 368 | 26.7  | 44.5  | 0 | 12.0 | 365.0 | 1.00 | No  |
| Poultry eggs                   | 368 | 74.1  | 110.8 | 0 | 30.0 | 730.0 | 1.00 | No  |
| <hr/>                          |     |       |       |   |      |       |      |     |
| Store-bought fish or seafood   |     |       |       |   |      |       |      |     |
| Canned tuna                    | 368 | 9.1   | 29.1  | 0 | 0.0  | 365.0 | 1.00 | Yes |
| Shrimp, crab, clams, oysters   | 368 | 10.2  | 33.3  | 0 | 0.0  | 365.0 | 1.00 | No  |
| Fish sticks or nuggets         | 368 | 13.9  | 34.1  | 0 | 0.0  | 365.0 | 1.00 | No  |
| <hr/>                          |     |       |       |   |      |       |      |     |
| Store-bought beef and pork     |     |       |       |   |      |       |      |     |
| Liver from beef                | 367 | 0.8   | 3.8   | 0 | 0.0  | 30.0  | 1.00 | No  |
| Oxtail soup or stew            | 368 | 12.3  | 27.2  | 0 | 0.0  | 365.0 | 1.00 | No  |
| Beef jerky                     | 368 | 15.9  | 42.5  | 0 | 0.0  | 365.0 | 1.00 | No  |
| Ground beef or meatloaf        | 368 | 20.2  | 51.1  | 0 | 12.0 | 730.0 | 1.00 | No  |
| Hamburger in a bun             | 367 | 21.3  | 54.8  | 0 | 12.0 | 730.0 | 1.00 | No  |

|                                                                                       |     |       |       |   |      |       |      |     |
|---------------------------------------------------------------------------------------|-----|-------|-------|---|------|-------|------|-----|
| Beef stir-fry with vegetables                                                         | 368 | 25.8  | 67.4  | 0 | 0.0  | 730.0 | 1.00 | No  |
| All other beef or pork                                                                | 366 | 26.2  | 47.6  | 0 | 12.0 | 287.0 | 1.00 | No  |
| Beef or pork soup                                                                     | 368 | 27.0  | 53.0  | 0 | 12.0 | 730.0 | 1.00 | No  |
| Sausage (beef or pork) or bacon                                                       | 368 | 28.0  | 56.1  | 0 | 12.0 | 365.0 | 1.00 | No  |
| Hot dogs and lunch meat                                                               | 367 | 29.8  | 61.7  | 0 | 12.0 | 730.0 | 1.00 | Yes |
| Beef stew or chili (meat)                                                             | 368 | 32.8  | 52.5  | 0 | 12.0 | 365.0 | 1.00 | No  |
| Spam                                                                                  | 368 | 35.4  | 70.9  | 0 | 12.0 | 730.0 | 1.00 | No  |
| <b>Fruits</b>                                                                         |     |       |       |   |      |       |      |     |
| Fresh fruit salad                                                                     | 368 | 11.5  | 39.8  | 0 | 0.0  | 365.0 | 1.00 | No  |
| Dried fruit                                                                           | 361 | 12.9  | 40.7  | 0 | 0.0  | 365.0 | 1.00 | No  |
| All other fresh fruit                                                                 | 368 | 15.3  | 54.6  | 0 | 0.0  | 730.0 | 1.00 | No  |
| Purchased berries (not in akutaq)                                                     | 368 | 16.8  | 41.3  | 0 | 0.0  | 365.0 | 1.00 | No  |
| Wild berries (not in akutaq)‡                                                         | 368 | 18.0  | 61.2  | 0 | 1.6  | 730.0 | 0.13 | No  |
| Fresh grapes                                                                          | 368 | 20.9  | 52.7  | 0 | 12.0 | 730.0 | 1.00 | No  |
| Market berries in akutaq                                                              | 368 | 21.1  | 65.3  | 0 | 0.0  | 730.0 | 1.00 | Yes |
| Fresh apple                                                                           | 368 | 27.6  | 61.1  | 0 | 12.0 | 730.0 | 1.00 | No  |
| Fresh banana                                                                          | 368 | 30.4  | 72.2  | 0 | 12.0 | 730.0 | 1.00 | No  |
| Fresh citrus                                                                          | 368 | 33.8  | 73.9  | 0 | 12.0 | 730.0 | 1.00 | Yes |
| Canned fruits                                                                         | 368 | 61.7  | 94.2  | 0 | 30.0 | 730.0 | 1.00 | No  |
| Wild berries in akutaq                                                                | 368 | 86.6  | 117.7 | 0 | 30.0 | 730.0 | 1.00 | No  |
| <b>Meats from the ocean</b>                                                           |     |       |       |   |      |       |      |     |
| Liver from marine animals‡                                                            | 367 | 2.8   | 17.6  | 0 | 0.0  | 240.9 | 0.33 | No  |
| Whale or walrus skin and fat‡                                                         | 368 | 6.3   | 22.3  | 0 | 0.0  | 287.0 | 0.17 | No  |
| Whale, seal, or walrus (not soup/stew)‡                                               | 368 | 7.5   | 24.1  | 0 | 0.0  | 287.0 | 0.04 | No  |
| Seal or walrus soup‡                                                                  | 367 | 23.8  | 40.4  | 0 | 12.0 | 287.0 | 0.33 | Yes |
| Dried seal, whale or walrus‡                                                          | 368 | 26.0  | 51.1  | 0 | 4.0  | 365.0 | 0.33 | No  |
| <b>Oily fish (e.g., salmon, whitefish, herring)</b>                                   |     |       |       |   |      |       |      |     |
| Whitefish soup‡                                                                       | 367 | 15.0  | 33.8  | 0 | 0.0  | 287.0 | 0.25 | No  |
| All other whitefish‡                                                                  | 366 | 19.8  | 39.1  | 0 | 12.0 | 365.0 | 0.25 | No  |
| Dried or smoked whitefish‡                                                            | 367 | 34.8  | 78.5  | 0 | 3.0  | 730.0 | 0.25 | No  |
| All other salmon‡                                                                     | 367 | 38.2  | 72.8  | 0 | 13.0 | 730.0 | 0.25 | No  |
| Salmon soup‡                                                                          | 367 | 41.3  | 55.2  | 0 | 30.0 | 365.0 | 0.25 | No  |
| Herring or smelt‡                                                                     | 364 | 49.4  | 98.5  | 0 | 5.7  | 730.0 | 0.04 | No  |
| Dried salmon                                                                          | 367 | 121.1 | 136.0 | 0 | 52.2 | 730.0 | 1.00 | Yes |
| <b>Other fish (e.g., halibut, flounder, tomcod, trout, pike, grayling, lush fish)</b> |     |       |       |   |      |       |      |     |
| Fish liver‡                                                                           | 365 | 5.4   | 18.1  | 0 | 0.0  | 182.6 | 0.25 | No  |
| Fish roe (not in akutaq or soup)‡                                                     | 364 | 9.9   | 27.0  | 0 | 0.0  | 287.0 | 0.25 | No  |
| Blackfish‡                                                                            | 366 | 14.3  | 45.1  | 0 | 3.0  | 730.0 | 0.25 | No  |

|                                           |     |      |       |   |      |       |      |     |
|-------------------------------------------|-----|------|-------|---|------|-------|------|-----|
| Fish soup (not salmon or whitefish soup)‡ | 367 | 15.3 | 39.6  | 0 | 0.0  | 287.0 | 0.25 | No  |
| Non-oily fish (not dried)‡                | 366 | 21.0 | 42.6  | 0 | 4.0  | 365.0 | 0.33 | Yes |
| Dried or smoked fish‡                     | 367 | 36.5 | 59.2  | 0 | 12.0 | 365.0 | 0.25 | No  |
| <hr/>                                     |     |      |       |   |      |       |      |     |
| Vegetables                                |     |      |       |   |      |       |      |     |
| Turnip                                    | 367 | 2.5  | 17.0  | 0 | 0.0  | 287.0 | 1.00 | No  |
| Coleslaw                                  | 368 | 3.4  | 20.9  | 0 | 0.0  | 365.0 | 1.00 | No  |
| Spinach (not wild spinach)                | 368 | 5.8  | 25.4  | 0 | 0.0  | 287.0 | 1.00 | No  |
| Beans                                     | 368 | 8.7  | 21.8  | 0 | 0.0  | 182.6 | 1.00 | No  |
| Green salad                               | 368 | 8.9  | 27.3  | 0 | 0.0  | 287.0 | 1.00 | Yes |
| Salad dressing                            | 368 | 10.7 | 33.2  | 0 | 0.0  | 365.0 | 1.00 | No  |
| Wild greens‡                              | 368 | 11.8 | 48.2  | 0 | 0.0  | 730.0 | 0.17 | Yes |
| Asparagus                                 | 368 | 12.3 | 47.4  | 0 | 0.0  | 730.0 | 1.00 | No  |
| Potato salad                              | 368 | 13.1 | 49.7  | 0 | 0.0  | 730.0 | 1.00 | Yes |
| Tomato                                    | 368 | 13.9 | 35.4  | 0 | 0.0  | 365.0 | 1.00 | No  |
| Cabbage                                   | 368 | 14.5 | 47.0  | 0 | 0.0  | 730.0 | 1.00 | No  |
| Cauliflower or broccoli                   | 368 | 19.5 | 59.8  | 0 | 0.0  | 730.0 | 1.00 | No  |
| All other vegetables                      | 368 | 20.2 | 73.5  | 0 | 0.0  | 730.0 | 1.00 | No  |
| French fries or fried potatoes            | 368 | 25.3 | 61.5  | 0 | 12.0 | 730.0 | 1.00 | No  |
| Carrots                                   | 368 | 31.1 | 54.3  | 0 | 12.0 | 365.0 | 1.00 | No  |
| Pickles                                   | 368 | 33.7 | 69.2  | 0 | 12.0 | 730.0 | 1.00 | No  |
| Baked, boiled or mashed potatoes          | 368 | 37.6 | 62.8  | 0 | 12.0 | 365.0 | 1.00 | No  |
| Mixed vegetables                          | 368 | 42.3 | 82.0  | 0 | 12.0 | 730.0 | 1.00 | No  |
| Green beans                               | 368 | 43.5 | 78.3  | 0 | 12.0 | 730.0 | 1.00 | Yes |
| Onion                                     | 368 | 48.4 | 101.0 | 0 | 12.0 | 730.0 | 1.00 | No  |
| Corn                                      | 368 | 59.3 | 101.8 | 0 | 30.0 | 730.0 | 1.00 | Yes |
| <hr/>                                     |     |      |       |   |      |       |      |     |
| Wild bird                                 |     |      |       |   |      |       |      |     |
| Dried bird‡                               | 368 | 2.8  | 14.7  | 0 | 0.0  | 182.6 | 0.25 | No  |
| Dried ptarmigan‡                          | 368 | 7.0  | 23.3  | 0 | 0.0  | 287.0 | 0.08 | No  |
| Wild bird eggs‡                           | 368 | 7.6  | 17.4  | 0 | 1.0  | 182.6 | 0.08 | No  |
| Ptarmigan soup‡                           | 368 | 8.0  | 21.1  | 0 | 2.4  | 182.6 | 0.08 | No  |
| Baked, boiled or grilled bird‡            | 368 | 16.6 | 31.4  | 0 | 3.0  | 182.6 | 0.25 | No  |
| Bird soup‡                                | 366 | 41.8 | 52.9  | 0 | 30.0 | 365.0 | 0.25 | Yes |
| <hr/>                                     |     |      |       |   |      |       |      |     |
| Wild game meat                            |     |      |       |   |      |       |      |     |
| Rabbit soup or stew‡                      | 368 | 0.6  | 5.6   | 0 | 0.0  | 104.4 | 0.08 | No  |
| Liver from wild game‡                     | 368 | 0.6  | 2.7   | 0 | 0.0  | 30.0  | 0.08 | No  |
| Raw or fresh frozen wild game‡            | 368 | 3.3  | 39.4  | 0 | 0.0  | 730.0 | 0.08 | No  |
| Dried wild game‡                          | 367 | 14.6 | 58.8  | 0 | 0.0  | 730.0 | 0.08 | No  |
| Baked or fried wild game (not soup/stew)‡ | 368 | 38.4 | 68.1  | 0 | 12.0 | 730.0 | 0.08 | No  |

|                 |     |      |       |   |      |       |      |     |
|-----------------|-----|------|-------|---|------|-------|------|-----|
| Wild game soup‡ | 368 | 90.1 | 111.6 | 0 | 30.0 | 730.0 | 0.08 | Yes |
|-----------------|-----|------|-------|---|------|-------|------|-----|

\* Beverage frequency is on a scale from "never or less than once per month to 6+ times per day", remaining categories are based on a frequency from "never or less than once per month to 2+ times per day".

† Number of respondents with food frequency data for the food.

‡ Seasonal food item. The seasonal weight indicates the proportion of the year that food item is typically available; otherwise 1.00 indicates that the food is typically eaten year round.

**Supplemental Table 2**

Pearson correlations of annual food consumption for foods included in factor analysis (n=358)\*

| No. Food                      | Food number (from column on left) |       |       |       |      |       |      |      |       |      |       |      |      |      |      |      |      |      |      |      |      |      |
|-------------------------------|-----------------------------------|-------|-------|-------|------|-------|------|------|-------|------|-------|------|------|------|------|------|------|------|------|------|------|------|
|                               | 1                                 | 2     | 3     | 4     | 5    | 6     | 7    | 8    | 9     | 10   | 11    | 12   | 13   | 14   | 15   | 16   | 17   | 18   | 19   | 20   | 21   | 22   |
| 1 Salty snacks                | 1.00                              |       |       |       |      |       |      |      |       |      |       |      |      |      |      |      |      |      |      |      |      |      |
| 2 Sweetened cereals           | 0.34                              | 1.00  |       |       |      |       |      |      |       |      |       |      |      |      |      |      |      |      |      |      |      |      |
| 3 Pizza                       | 0.40                              | 0.26  | 1.00  |       |      |       |      |      |       |      |       |      |      |      |      |      |      |      |      |      |      |      |
| 4 Sweetened drinks            | 0.43                              | 0.32  | 0.25  | 1.00  |      |       |      |      |       |      |       |      |      |      |      |      |      |      |      |      |      |      |
| 5 Hot dogs and lunch meat     | 0.33                              | 0.30  | 0.34  | 0.22  | 1.00 |       |      |      |       |      |       |      |      |      |      |      |      |      |      |      |      |      |
| 6 Fried chicken               | 0.26                              | 0.19  | 0.26  | 0.16  | 0.35 | 1.00  |      |      |       |      |       |      |      |      |      |      |      |      |      |      |      |      |
| 7 Canned tuna                 | 0.24                              | 0.23  | 0.26  | 0.12  | 0.32 | 0.21  | 1.00 |      |       |      |       |      |      |      |      |      |      |      |      |      |      |      |
| 8 Fresh citrus                | 0.26                              | 0.19  | 0.22  | 0.23  | 0.31 | 0.24  | 0.17 | 1.00 |       |      |       |      |      |      |      |      |      |      |      |      |      |      |
| 9 Potato salad                | 0.25                              | 0.21  | 0.24  | 0.22  | 0.19 | 0.25  | 0.26 | 0.31 | 1.00  |      |       |      |      |      |      |      |      |      |      |      |      |      |
| 10 Citrus juice               | 0.27                              | 0.21  | 0.25  | 0.25  | 0.34 | 0.27  | 0.21 | 0.39 | 0.34  | 1.00 |       |      |      |      |      |      |      |      |      |      |      |      |
| 11 Corn                       | 0.37                              | 0.15  | 0.33  | 0.26  | 0.34 | 0.25  | 0.28 | 0.33 | 0.27  | 0.26 | 1.00  |      |      |      |      |      |      |      |      |      |      |      |
| 12 Green beans                | 0.20                              | 0.14  | 0.21  | 0.10  | 0.32 | 0.26  | 0.17 | 0.31 | 0.18  | 0.25 | 0.39  | 1.00 |      |      |      |      |      |      |      |      |      |      |
| 13 Green salad                | 0.25                              | 0.14  | 0.16  | 0.20  | 0.25 | 0.24  | 0.24 | 0.33 | 0.27  | 0.30 | 0.25  | 0.24 | 1.00 |      |      |      |      |      |      |      |      |      |
| 14 Pudding and jello          | 0.19                              | 0.20  | 0.23  | 0.16  | 0.22 | 0.17  | 0.12 | 0.28 | 0.25  | 0.30 | 0.19  | 0.22 | 0.29 | 1.00 |      |      |      |      |      |      |      |      |
| 15 Dried salmon               | 0.14                              | 0.09  | 0.06  | 0.18  | 0.11 | 0.06  | 0.07 | 0.23 | 0.19  | 0.17 | 0.18  | 0.09 | 0.13 | 0.19 | 1.00 |      |      |      |      |      |      |      |
| 16 Wild game soup†            | 0.25                              | 0.12  | 0.10  | 0.19  | 0.13 | 0.06  | 0.06 | 0.28 | 0.14  | 0.12 | 0.16  | 0.07 | 0.09 | 0.12 | 0.24 | 1.00 |      |      |      |      |      |      |
| 17 Pancakes                   | 0.10                              | 0.01  | -0.03 | -0.05 | 0.13 | 0.09  | 0.02 | 0.09 | 0.21  | 0.12 | 0.06  | 0.06 | 0.05 | 0.11 | 0.07 | 0.11 | 1.00 |      |      |      |      |      |
| 18 Market berries in akutaq   | 0.13                              | 0.12  | 0.05  | 0.16  | 0.14 | 0.21  | 0.11 | 0.14 | 0.15  | 0.17 | 0.18  | 0.16 | 0.06 | 0.12 | 0.12 | 0.00 | 0.01 | 1.00 |      |      |      |      |
| 19 Seal or walrus soup†       | 0.08                              | 0.11  | 0.03  | 0.14  | 0.16 | 0.11  | 0.12 | 0.12 | -0.01 | 0.11 | -0.01 | 0.08 | 0.03 | 0.08 | 0.02 | 0.12 | 0.06 | 0.04 | 1.00 |      |      |      |
| 20 Non-oily fish (not dried)† | -0.02                             | -0.07 | -0.06 | 0.04  | 0.03 | 0.09  | 0.05 | 0.01 | -0.02 | 0.12 | 0.02  | 0.13 | 0.07 | 0.02 | 0.05 | 0.05 | 0.04 | 0.05 | 0.36 | 1.00 |      |      |
| 21 Wild greens†               | 0.07                              | -0.03 | -0.01 | 0.00  | 0.13 | -0.01 | 0.12 | 0.20 | 0.17  | 0.14 | 0.11  | 0.23 | 0.16 | 0.05 | 0.02 | 0.15 | 0.12 | 0.03 | 0.25 | 0.28 | 1.00 |      |
| 22 Bird soup†                 | 0.06                              | -0.06 | 0.03  | 0.06  | 0.08 | 0.06  | 0.02 | 0.17 | 0.11  | 0.08 | 0.05  | 0.04 | 0.01 | 0.08 | 0.23 | 0.23 | 0.04 | 0.07 | 0.27 | 0.14 | 0.19 | 1.00 |

\* Correlation coefficients highlighted in gray have a *P* value ≤0.05

† Seasonal food items
